# Supplementary material for: Enhanced acidity of cyclopenta-2,4-dienylborane and its Al and Ga analogues. The role of aromatization
Source: Royal Society of Chemistry journal article supplement (doi:10.1039/b906045f), 2009-01-01
Supplement: b906045f.pdf [file b906045f.pdf]

**Enhanced Acidity of cyclopenta-2,4-dienylborane and its Al and Ga analogues. The role of aromatization**

Marcela Hurtado, Manuel Yáñez, and Jean-Claude Guillemin

*Contribution from the Departamento de Química, C-9. Universidad Autónoma de*

*Madrid. Cantoblanco. 28049-Madrid. Spain and the École Nationale Supérieure de*

*Chimie de Rennes, CNRS, UMR 6226, Avenue du Général Leclerc, CS 50837, 35708*

*Rennes Cedex 7, France and the Université européenne de Bretagne.*

**Supplementary Information**

**(total 2 pages)**

**Table S1.** Total energies (in hartrees) and relative stability in terms of Gibbs free energies ( $\Delta G$  in  $\text{kJ mol}^{-1}$ ) of the anionic species produced by the C1 and Hcis deprotonation of cyclopenta-2,4-dienylgallium dihydride

| method                                     | C1          | Hcis        | $\Delta G$ |
|--------------------------------------------|-------------|-------------|------------|
| B3LYP/6-311+G(d,p)                         | -2119.05716 | -2119.05804 | 3.5        |
| B3LYP/6-311++G(3df,2p)//B3LYP/6-311+G(d,p) | -2119.07255 | -2119.07344 | 3.7        |
| B3LYP/6-311++G(3df,2p)                     | -2119.07262 | -2119.07344 | 3.9        |
| B3LYP/6-311++G(3df,2p)//CCSD/6-311+G(d,p)  | -2119.07179 | -2119.07094 | 8.0        |
| CCSD/6-311+G(d,p)                          | -2116.86270 | -2116.86370 | 3.1        |
| CCSD(T)/6-311+G(d,p)// CCSD/6-311+G(d,p)   | -2116.90384 | -2116.90465 | 3.6        |

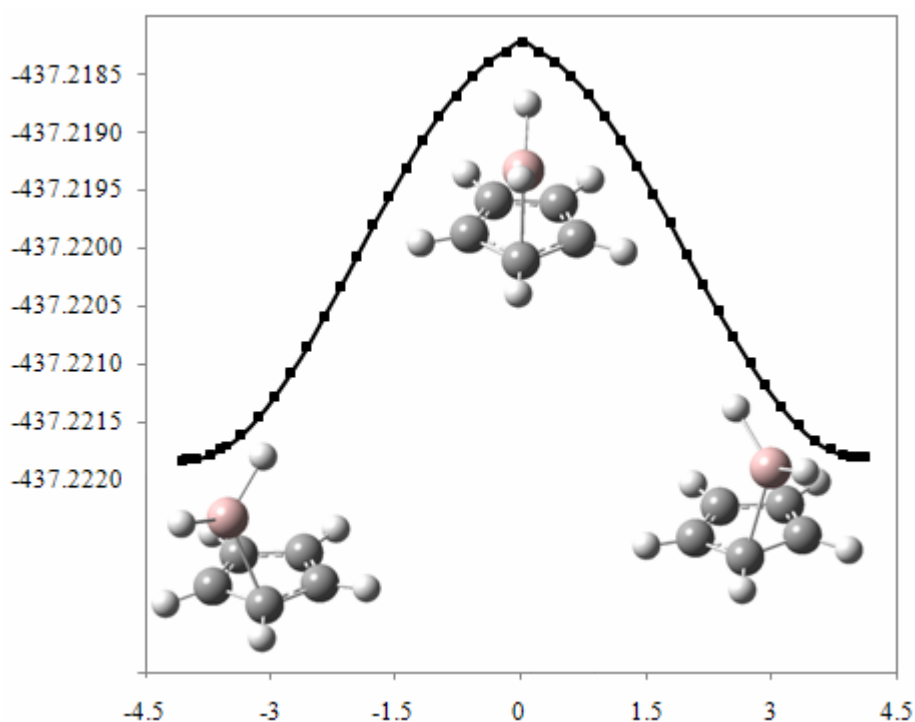

**Figure S1.** Potential energy curve of the sigmatropic rearrangement of  $\text{AlH}_2$ -cyclopentane derivative associated with the migration of the  $\text{AlH}_2$  around the cyclopentadienyl ring.
